# Supplementary material
Source: PubMed Central journal article supplement (PMC5087005)
Supplement: pnas.1614594113.sapp.pdf [file pnas.1614594113.sapp.pdf]

## SUPPORTING INFORMATION (SI) APPENDIX

### Structure and assembly model for the *Trypanosoma cruzi* 60S ribosomal subunit

Zheng Liu<sup>1\*</sup>, Cristina Gutierrez-Vargas<sup>2\*</sup>, Jia Wei<sup>2\*</sup>, Robert A. Grassucci<sup>1,3</sup>, Madhumitha Ramesh<sup>4</sup>, Noel Espina<sup>5</sup>, Ming Sun<sup>2</sup>, Beril Tutuncuoglu<sup>4</sup>, Susan Madison-Antenucci<sup>5</sup>, John L. Woolford, Jr.<sup>4</sup>, Liang Tong<sup>2</sup>, and Joachim Frank<sup>1,2,3#</sup>

1. Department of Biochemistry and Molecular Biophysics, Columbia University, New York, NY 10032, USA
2. Department of Biological Sciences, Columbia University, New York, NY 10027, USA
3. Howard Hughes Medical Institute, Columbia University, New York, NY 10032, USA
4. Department of Biological Sciences, Carnegie Mellon University, Pittsburgh, PA 15213, USA
5. Parasitology Laboratory, Wadsworth Center, New York State Department of Health, Albany, NY, 12208, USA

\*These authors contributed equally to this work.

#To whom correspondence should be addressed. Email: jf2192@cumc.columbia.edu

**Author Contributions:** J.F. and Z.L. designed the experiments. J.F. supervised the project. S.M.-A. and N.E. provided the *T. cruzi* cell extract. Z.L. and C.G.-V. purified the ribosomes. Z.L. performed the cryo-EM experiments and the image data analysis. R.A.G. assisted in the screening of the samples. J.W., Z.L., M.S., and L.T. performed the structural modeling. Z.L., C.G.-V., J.W., L.T., M.S., M.R., B.T. and J.L.W. analyzed the structure. Z.L., C.G.-V., J.W., L.T., M.S., S.M.-A., M.R., B.T., J.L.W and J.F. wrote the manuscript.

The authors declare no conflict of interest.

Data deposition: All cryo-EM map and model described in this manuscript have been deposited in the Electron Microscopy Data Bank (EMDB) (accession nos. EMD-8361, PDB code: 5T5H)

## Supporting Information (SI Appendix)

|                                                                                                                                                                      |    |
|----------------------------------------------------------------------------------------------------------------------------------------------------------------------|----|
| SI text. Structure and possible role of Expansion segments                                                                                                           | 3  |
| Fig. S1. Classification of the <i>T. cruzi</i> ribosome cryo-EM data set.                                                                                            | 4  |
| Fig S2. Resolution estimation of the 3D-reconstruction.                                                                                                              | 5  |
| Fig. S3. Side chain features of 60S subunit of <i>T. cruzi</i> ribosome.                                                                                             | 6  |
| Fig. S4. rRNA arrangement and atomic model of the 60S subunit.                                                                                                       | 7  |
| Fig. S5. Cryo-EM allows identification of variations in rRNA and proteins.                                                                                           | 8  |
| Fig. S6. <i>T. cruzi</i> large subunit rRNA pieces and the corresponding rRNA domains in yeast.                                                                      | 9  |
| Fig. S7. Proteins for scaffold stabilization.                                                                                                                        | 10 |
| Fig. S8. Anchoring proteins for small-rRNAs assembly.                                                                                                                | 11 |
| Fig. S9. Small pieces rRNAs.                                                                                                                                         | 12 |
| Fig. S10. <i>T. cruzi</i> and yeast 5.8S and 5S rRNAs.                                                                                                               | 13 |
| Fig. S11. rRNA and r-protein associations on the large subunit .                                                                                                     | 14 |
| Fig. S12. srRNA3 and its homologous rRNA ES39L in yeast surroundings.                                                                                                | 15 |
| Fig. S13. Sequence alignment of 5S rRNA associated proteins.                                                                                                         | 16 |
| Fig. S14. Comparison of some regions of 2.5 Å <i>T. cruzi</i> and 5.5 Å <i>T. brucei</i> ribosome density maps, superimposed with their corresponding atomic models. | 17 |
| Fig. S15. Schematic representation of the large subunit rRNA genes (except 5S rRNA) from trypanosomatids.                                                            | 18 |
| Fig. S16. ES7L and its contacting proteins uL4 and uL30.                                                                                                             | 19 |
| Fig. S17. C-terminal extension of eL29 contacts eL18 and is surrounded by ES9L, ES12L.                                                                               | 20 |
| Table S1. The length of different pieces rRNA (excerpt 5S) for three trypanosomatids                                                                                 | 21 |
| Table S2. 3D reconstruction and model statistics of <i>T. cruzi</i> large ribosomal subunit                                                                          | 22 |
| Table S3. Summary of the <i>T. cruzi</i> ribosomal large subunit model                                                                                               | 23 |
| Table S4. Summary of the modeled ribosomal rRNA                                                                                                                      | 24 |
| Table S5. The unmolded ribosomal rRNA of LSU- $\alpha$ / $\beta$ location                                                                                            | 25 |
| Table S6. The expansion segments with unusual size and Trypanosome-specific ES                                                                                       | 26 |
| Table S7. Modeled proteins of the <i>T. cruzi</i> 60S ribosomal subunit                                                                                              | 27 |
| Table S8. Residues of anchoring proteins involved in assembly of small pieces rRNA                                                                                   | 28 |
| Table S9. Expansion segments compared with human ribosome counterparts                                                                                               | 29 |
| Table S10. Proteins compared with human and yeast ribosome counterparts                                                                                              | 30 |

## SI Text: Structure and possible role of Expansion segments

Our structure shows various trypanosome-specific ESs forming contacts with functionally significant proteins that are extended or truncated in *T. cruzi*, when compared to their yeast counterparts. These ESs include ES9L, ES27L, ES7L, ES12L, and ES31L as well as those described in the main text, ES42L and the KSD.

ES7L in *T. cruzi* is composed of two long bent helices while in yeast this ES is made up of only one long helix and a short helix (Fig. S16). The tip of the trypanosome-unique long helix interacts with proteins uL30 and uL4. Protein uL30 is conserved with respect to its yeast counterpart and uL4, situated between the two long bent helices, bears a C-terminal extension (Fig. S16). Considering that uL4 is a component of the protein exit tunnel, this unusual configuration of ES7L has a possible function in sensing or regulating the passage of nascent polypeptides through the tunnel.

*T. cruzi* ES9L is composed of three helices instead of the two helices seen in yeast ES9L (named ES9L-h1-3). Helix ES9L-h3, with no homolog in yeast, surrounds one side of eL29, which bears an extended C-terminal portion exposed on the surface (Fig. S17). The other sides of eL29 are surrounded by ES9L-h1 and ES12. Together these three helices position the C-terminal of eL29 to be exposed stably on the surface, while the protein's N-terminal domain threads through the rRNA core in the vicinity of the PTC.

ES27L (located below srRNA1, as viewed from solvent side) and ES31L, which emerges from the base of the L1 stalk, have both increased in size compared to their yeast counterparts. The dynamic behavior of ES27L makes it visible only at low thresholds on the unsharpened density map (Fig. 1E). ES27L forms a novel intern subunit bridge as revealed in the *T. brucei* structure (1), and also provides a platform for the S-domain of the signal recognition particle (SRP) (2). Thus, it has been proposed to regulate access of factors to the peptide exit tunnel. ES31L, whose assembly is described in the main text, is anchored at the base of the L1 stalk and is a dynamic element instrumental in evacuating the exit-site tRNA (3). ES31L is composed of three helices instead of two as seen in yeast (Fig. 3B). The third, trypanosome-specific helix is in contact with protein eL8 and runs parallel with the L1 stalk. This helix also interacts with the 3'-end of the 5.8S rRNA via residue 865 (Fig. 3B). Moreover, ES31L contacts the N-terminal extension of uL23, a signaling protein for SRP (4).

Altogether, these trypanosome-specific rRNA ESs form contacts with functionally significant extended or truncated r-proteins (summarized in Table S6), suggesting the architecture of the *T. cruzi* ribosome may be specialized to modulate nascent peptide conducting, protein targeting, and other translational events such as GTPase activation by the sarcin-ricin loop.

## Additional References

1. Hashem Y, *et al.* (2013) High-resolution cryo-electron microscopy structure of the *Trypanosoma brucei* ribosome. *Nature* 494(7437):385-389.
2. Anger AM, *et al.* (2013) Structures of the human and *Drosophila* 80S ribosome. *Nature* 497(7447):80-85.
3. Korostelev A, Ermolenko DN, & Noller HF (2008) Structural dynamics of the ribosome. *Current opinion in chemical biology* 12(6):674-683.
4. Park E, *et al.* (2014) Structure of the SecY channel during initiation of protein translocation. *Nature* 506(7486):102-106.

**Fig. S1**

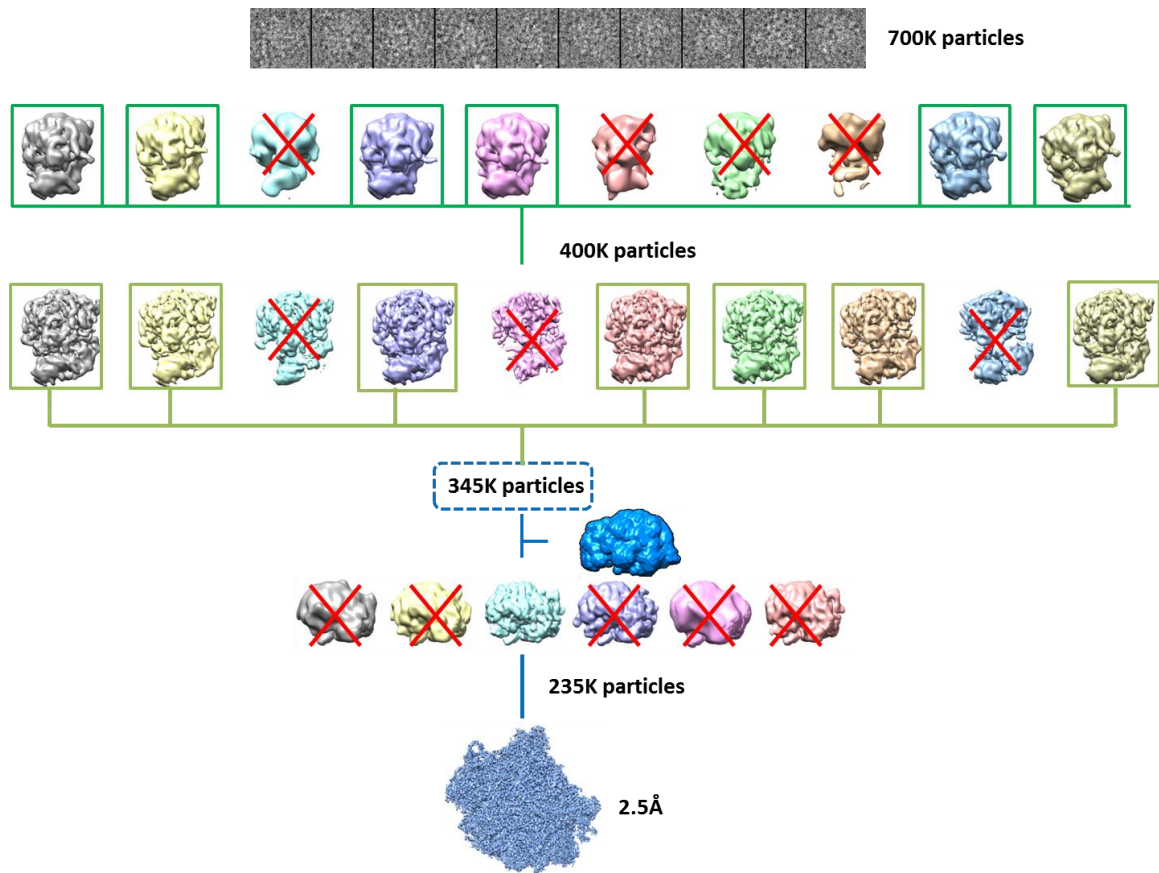

**Fig. S1. Classification of the *Trypanosoma cruzi* ribosome cryo-EM data set.** First row, ten particles selected from 700,000. Second row, primary classification with K= 10 classes, generating six ribosome-like and four bad classes. Third row, further classification of ribosome-like particles, again with K=10, yielding seven fully formed ribosome classes and three with broken 40S subunit. Fourth row, focused classification using K=6, with 60S subunit mask placed on all particles (345,000), yielding one dominant class. Fifth row, resulting focused reconstruction of the 60S subunit from 235,000 particles.

Fig.S2

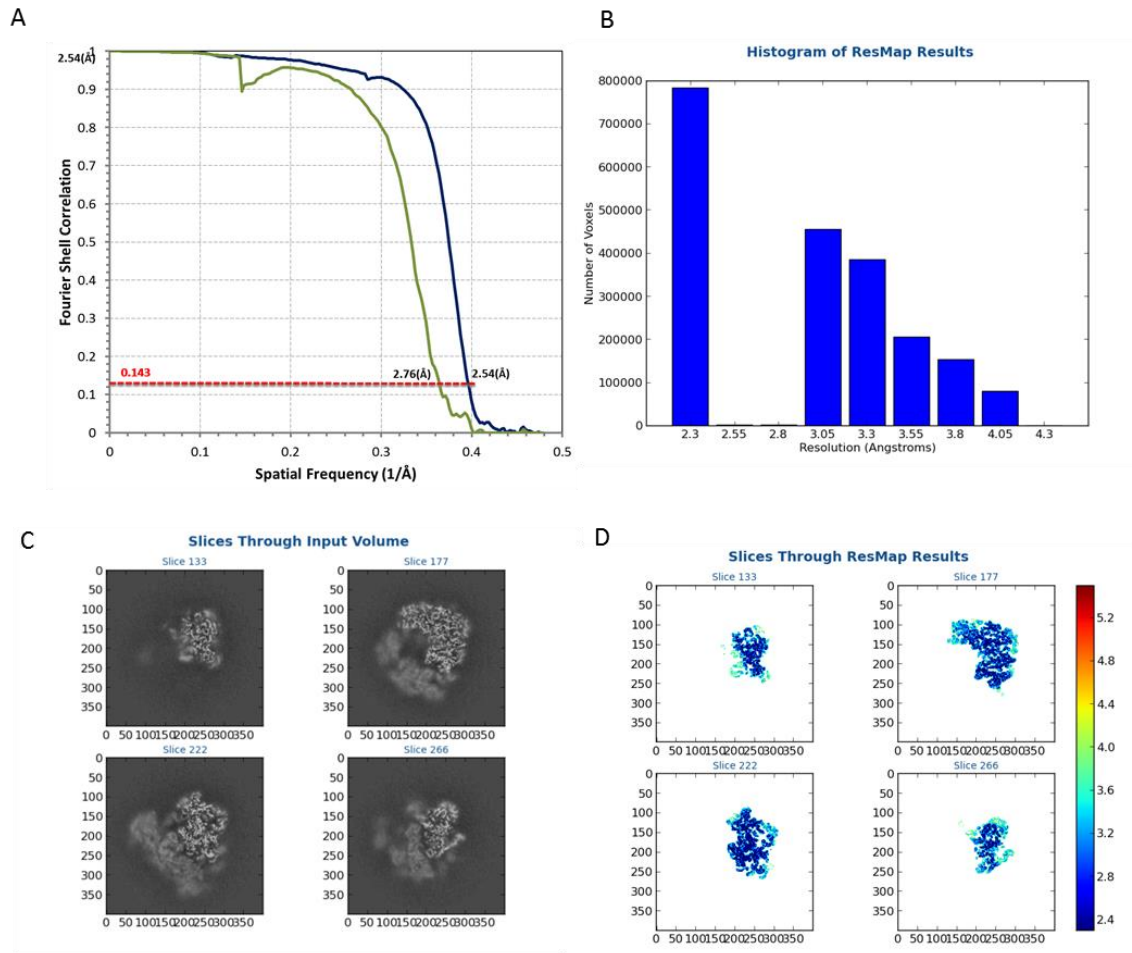

Fig S2. **Resolution estimation of the 3D-reconstruction** (A) FSC of the 60S subunit reconstruction (dark blue: model region; green: whole map). (B-D) Local resolution evaluation using *resmap*. Shown are outputs of the *resmap* software: (B) histogram distribution of resolution values; (C) density sections and (D) resolution distributions in the same set of sections shown in (C).

Fig S3

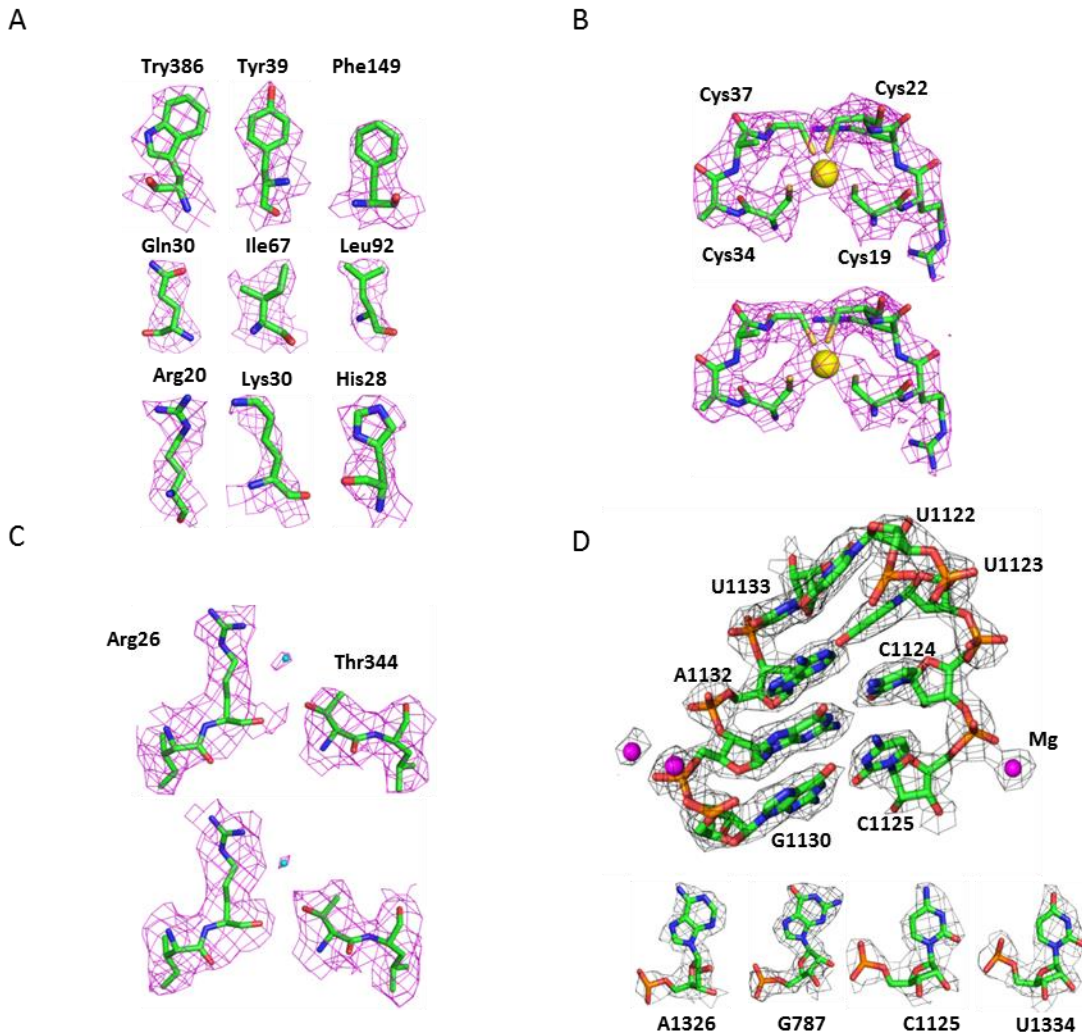

**Fig. S3. Side chain features of 60S subunit of *Trypanosoma cruzi* ribosome.** (A) Densities for some of the amino acids. Top, three aromatic residues; middle, three hydrophobic residues; bottom, three basic residues. These residues are from the proteins uL3, eL37 and uL15. (B,C) Reproducibility of water molecule (B), and zinc ion (C) assignments through comparison of half-maps. These regions are also displayed in Fig 1.b. (D) Cryo-EM density of a highlighted rRNA region of LSU- $\alpha$  docked with atomic model. Bottom panel, examples for the four nucleotides in rRNA.

Fig.S4

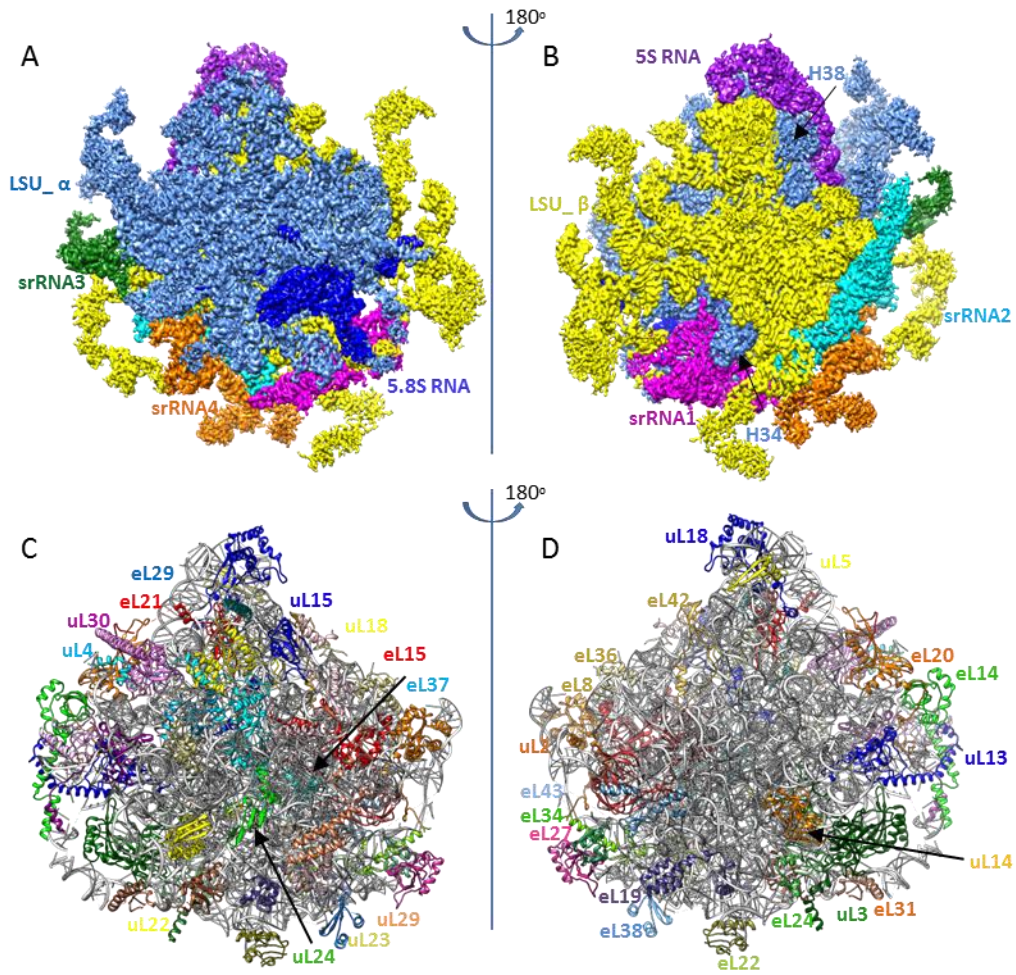

**Fig. S4. rRNAs arrangement and atomic model of the 60S subunit.** (A, B) Arrangement of the eight pieces of rRNA in the large subunit within the electron density map; r-proteins are omitted for clear display of rRNA. (A) Solvent and (B) interface view. (C, D) architecture of proteins in the large subunit, in solvent (C) and interface (D) view.

Fig.S5

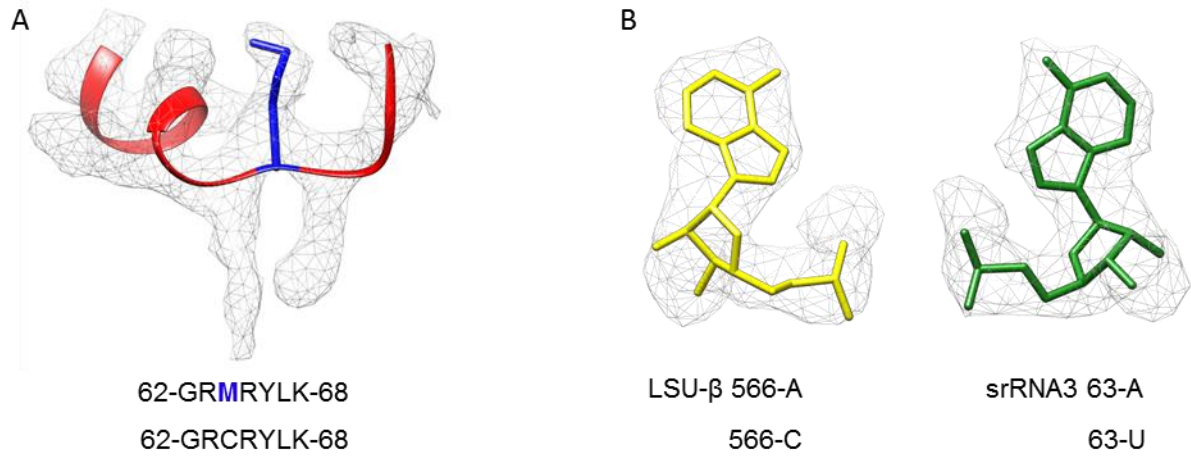

**Fig. S5. Cryo-EM allows identification of variations in rRNA and proteins.** (A) Density map (gray mesh) of the fragment of a.a. 62-68 on eL37. Met-64 (blue) is clearly represented in the density although the sequence XP\_807547.1. has a Cysteine residue (B) Density map (gray mesh) of the A-566 on LSU-β and A-63 on srRNA3, in conflict with the sequences which contain C and U at these locations, respectively.



Fig.S6

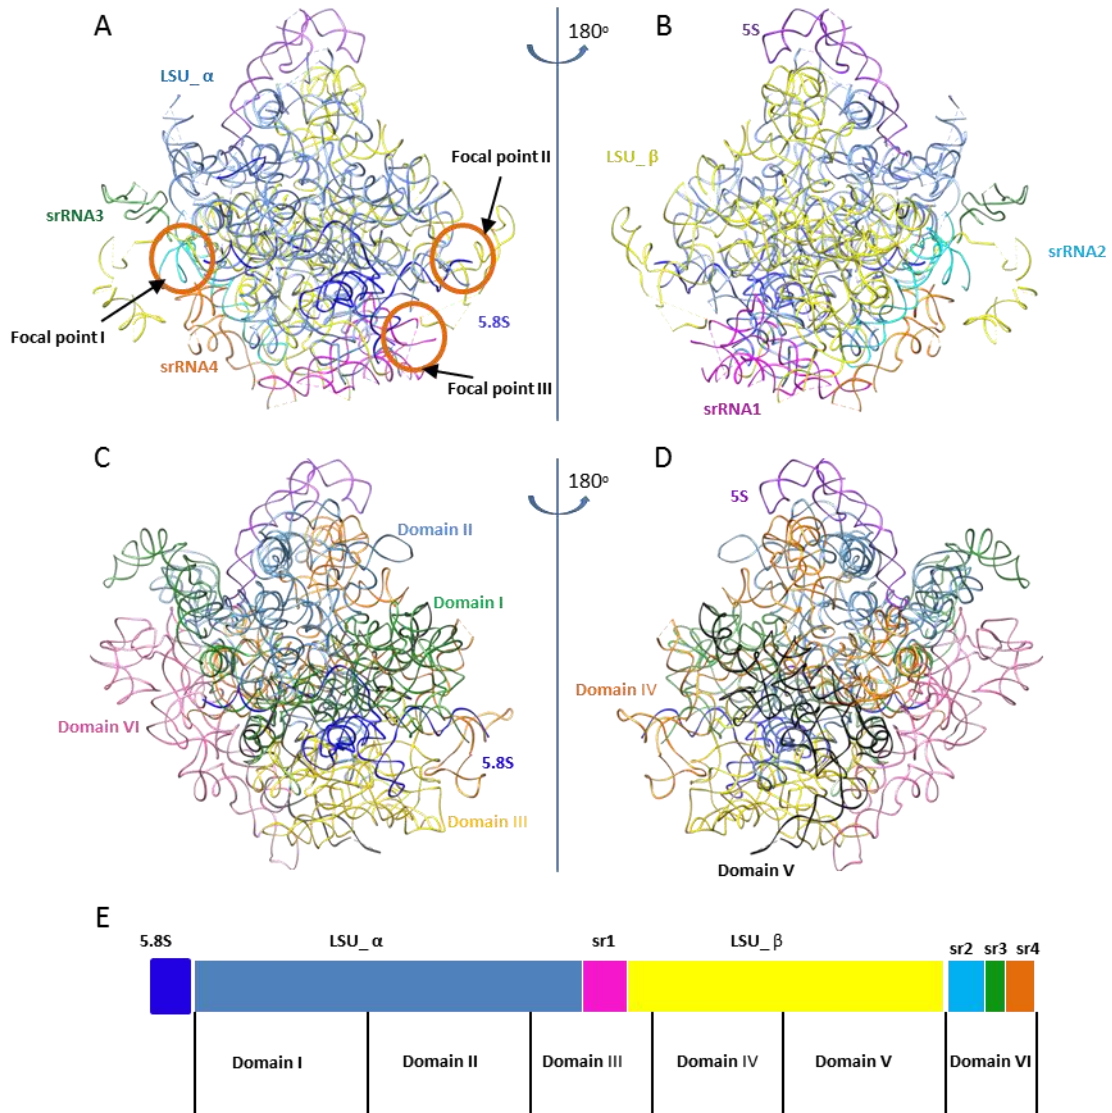

**Fig. S6. *T. cruzi* large subunit rRNA pieces and the corresponding rRNA domains in yeast.** (A, B) The eight pieces of rRNA in the *T. cruzi* ribosomal large subunit, in solvent (A) and interface (B) view. (C, D) The domains of rRNA in yeast 25S rRNA, in solvent (c) and interface (D) view. (E) Correspondence between the different pieces of *T. cruzi* rRNA and the domains from yeast 25S rRNA. srRNA1-4 are denoted by sr1-4.

Fig.S7

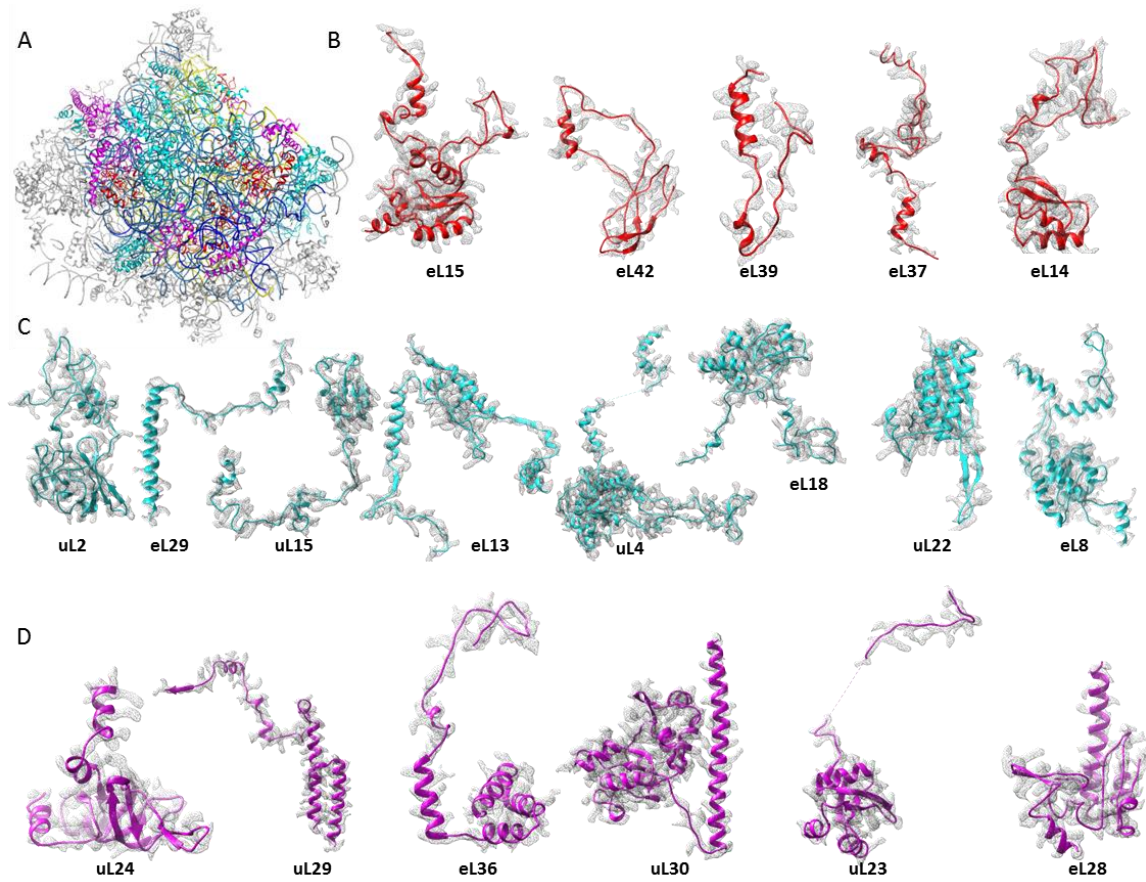

**Fig. S7. Proteins for scaffold stabilization.** (A) The scaffold encompasses the conserved region of LSU- $\alpha$  (sky blue) and LSU-B (yellow), the whole 5.8S rRNA (blue), and its associated proteins. (B) Group-one proteins, which are buried in the scaffold. (C) Group-two proteins, bearing large spanning domains. (D) Group-three proteins, located on the surface.

Fig.S8

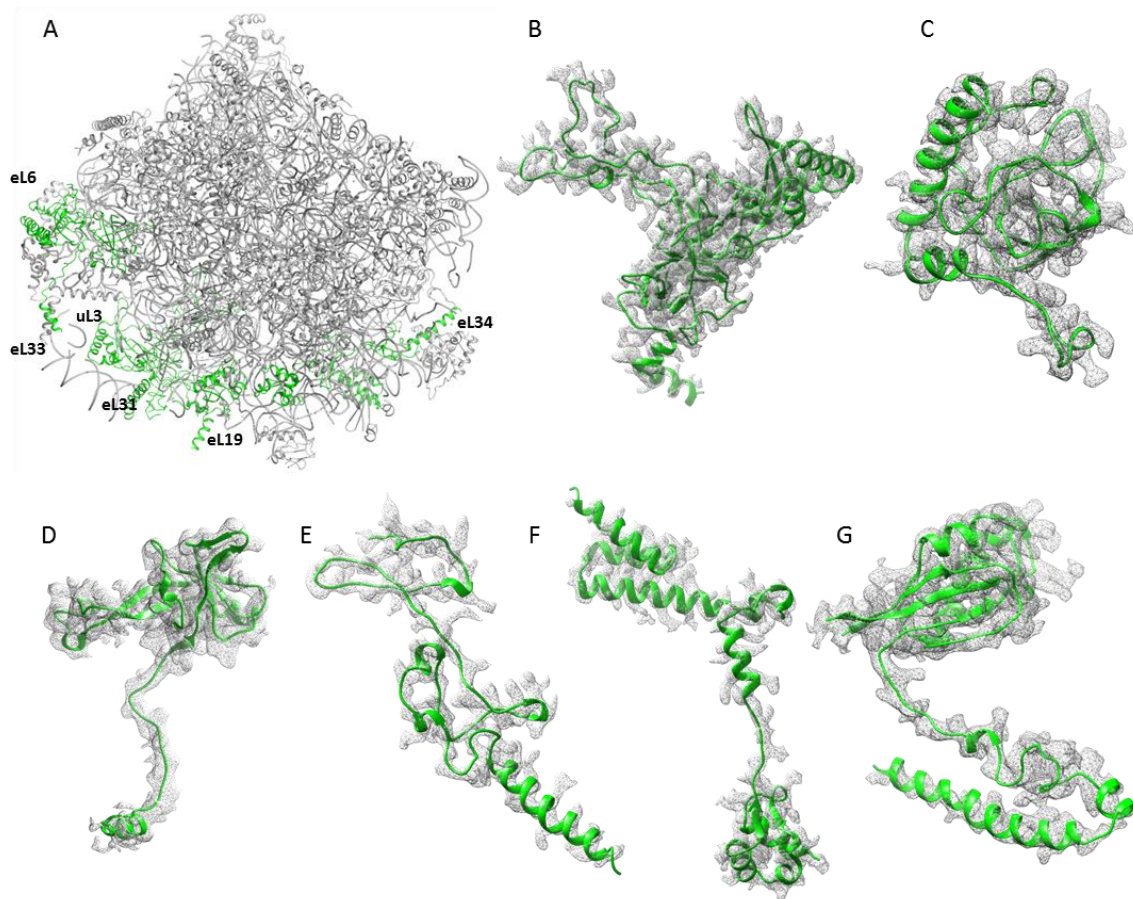

**Fig. S8. Anchoring proteins for small-rRNAs assembly.** (A) Locations of the anchoring proteins connecting the scaffold and small rRNAs. (B) uL3. (C) eL6. (D) eL33. (E) eL34. (F) eL19. (G) eL31.

Fig.S9

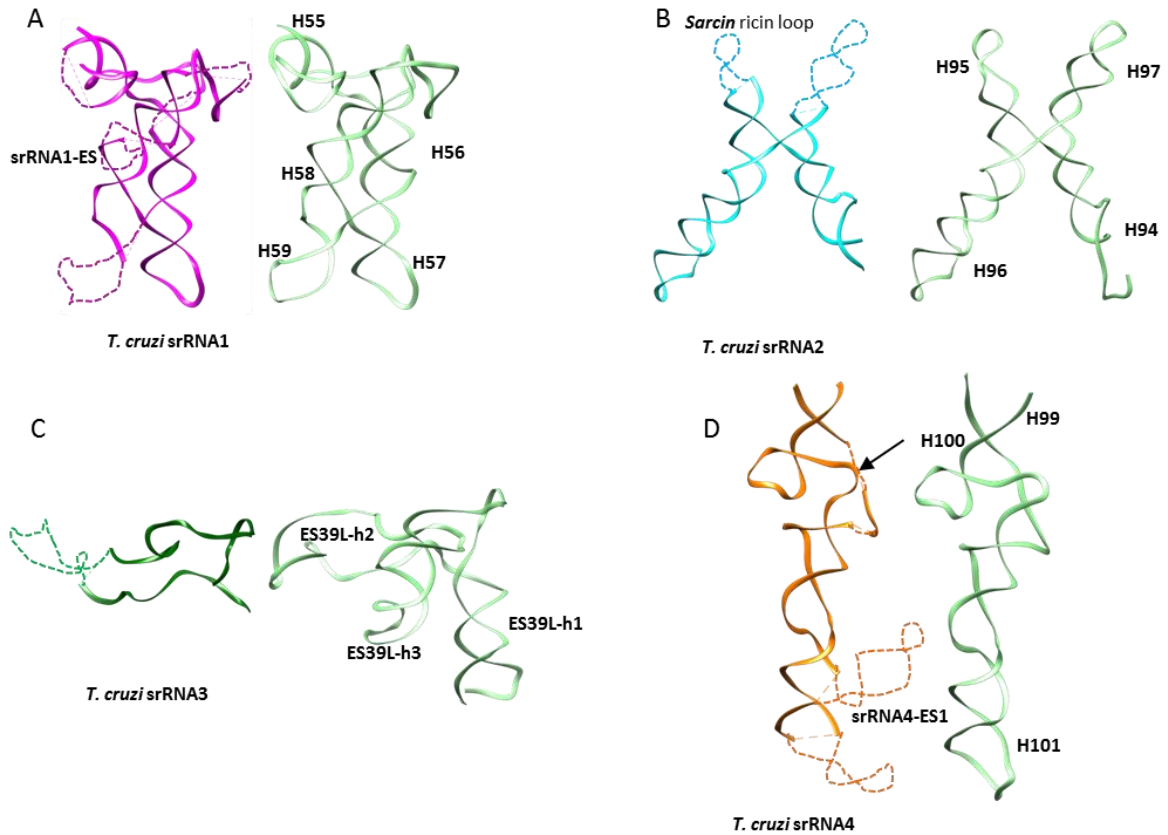

**Fig. S9. Small rRNAs.** (A) srRNA1 (magenta, left) and its homologous region in yeast (light green). (B) *T. cruzi* srRNA2 (cyan, left) and its homologous region, H94-97 of yeast (light green). (C), *T. cruzi* srRNA3 (forest green) and its homologous region ES39L of yeast (light green). (D) *T. cruzi* srRNA4 (orange) and its homologous region in yeast (light green). The arrow marks the shorter *T. cruzi* loop compared with yeast, which avoids conflict with the N-terminus of eL31. The un-modelled regions of the small rRNAs are connected by a dotted line according to the *T. brucei* model (4V8M.pdb) and our unsharpened density map.

Fig.S10

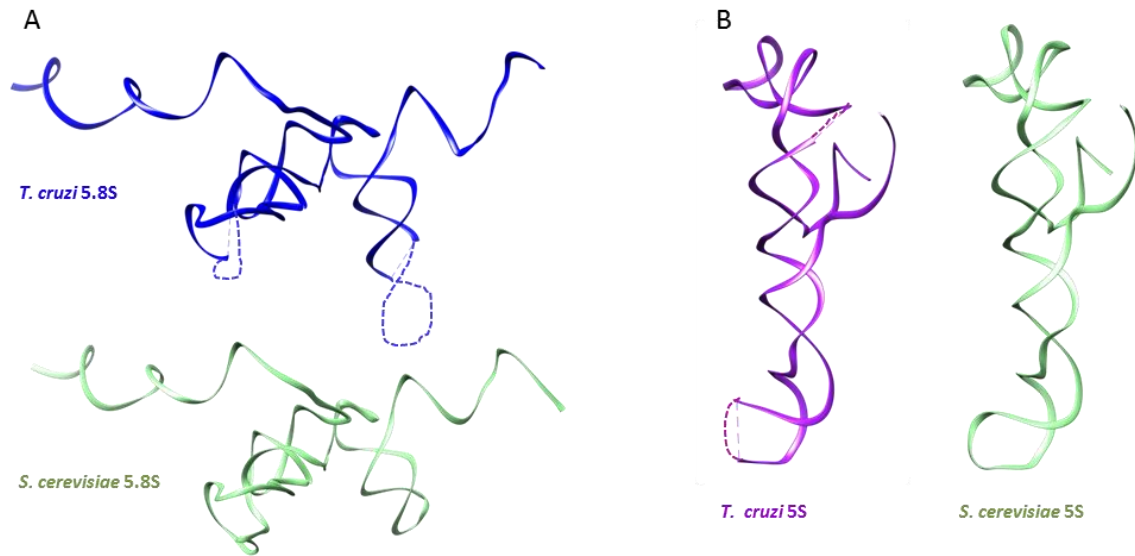

**Fig. S10. *T. cruzi* and yeast 5.8S and 5S rRNAs.** (A) 5.8S rRNA, upper is from our *T. cruzi* structure, bottom (light green) is from the yeast ribosome structure. (B) 5S rRNA, left is from our *T. cruzi* structure, right (light green) is from yeast. The un-modelled regions of the small rRNAs are connected by a dotted line according to the *T. brucei* model (4V8M.pdb) and our unsharpened density map.

Fig.S11

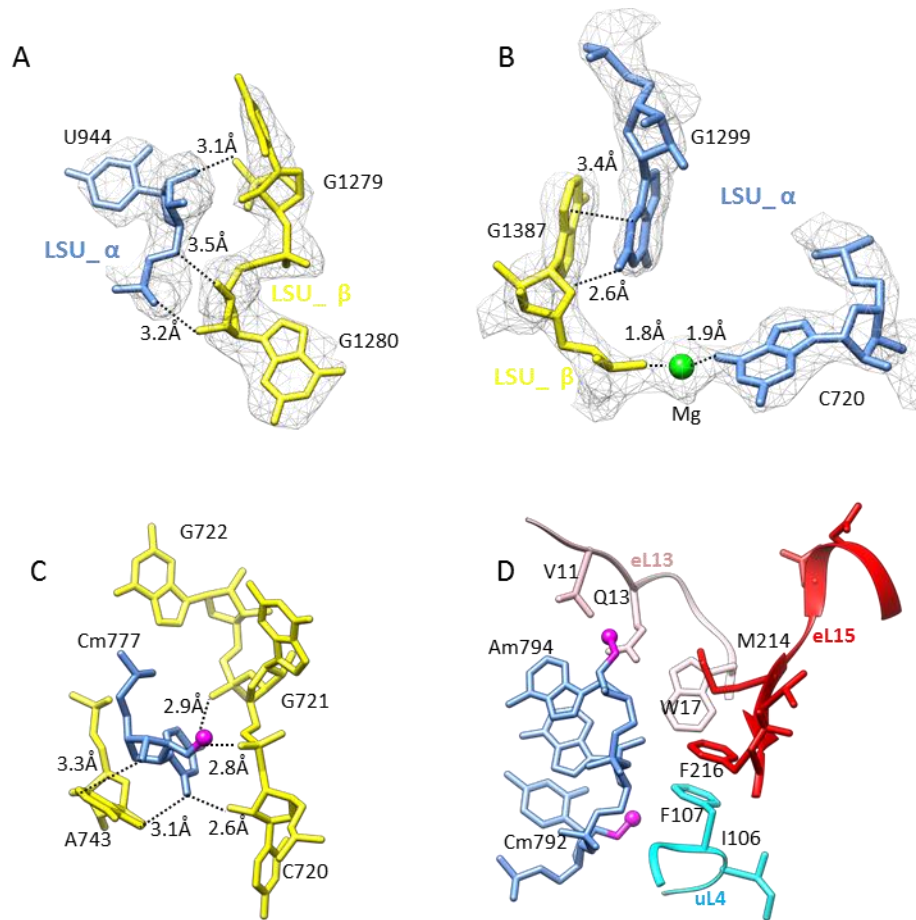

**Fig. S11. rRNA and r-protein associations on the large subunit.** (A) Interactions between U944 of LSU- $\alpha$  and G1279 and G1280 of LSU- $\beta$ . (B) Interactions between G1387 of LSU- $\beta$  and G1299 and G720 of LSU- $\alpha$ ; Mg<sup>2+</sup> takes part in forming the LSU- $\alpha$  - LSU- $\beta$  interaction. (C) Modified rRNA nucleotides participate in forming interactions between LSU- $\alpha$  and LSU- $\beta$ . Cm777 is a methyl-modified residue of LSU- $\alpha$ . (D) A hydrophobic region formed by modified nucleotides and r-proteins. The magenta spheres in rRNA model denote methyl groups.

Fig.S12

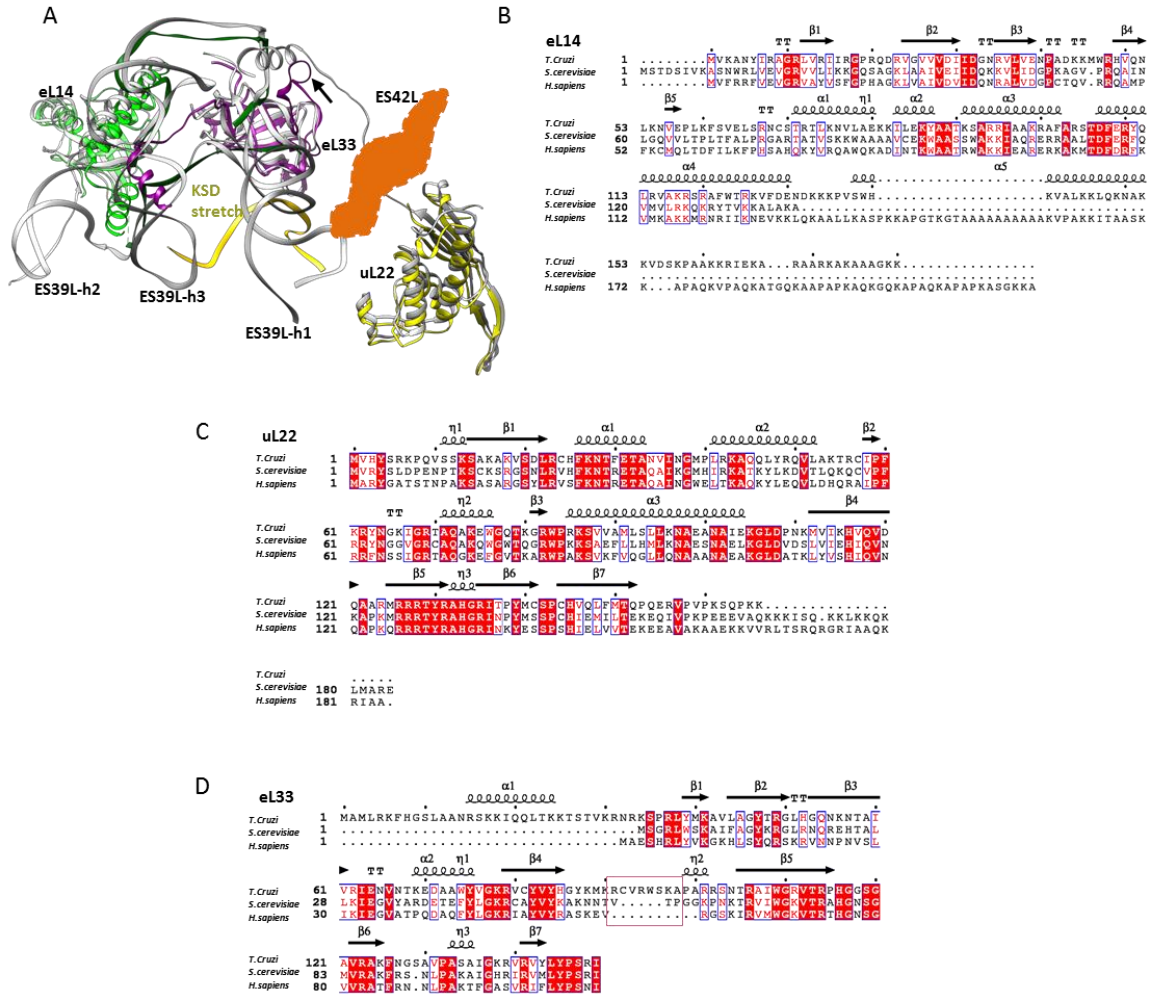

**Fig. S12. srRNA3 and its homologous rRNA ES39L in yeast surroundings.** (A), Overlay of srRNA3 and its surrounding region, which includes eL14, eL33, and uL22 of *T. cruzi*. For comparison, the ES39L region of yeast is also shown in grey. ES42L has been added by manual drawing. The arrows indicate the insertion of the eL33 (marked by magenta box in (D)), which occupies the position of the C-terminal of uL22 in the yeast ribosome structure. (B) Sequence alignment of r-protein eL14. (C) Sequence alignment of r-protein uL22. (D) Sequence alignment of r-protein eL33.

Fig. S13

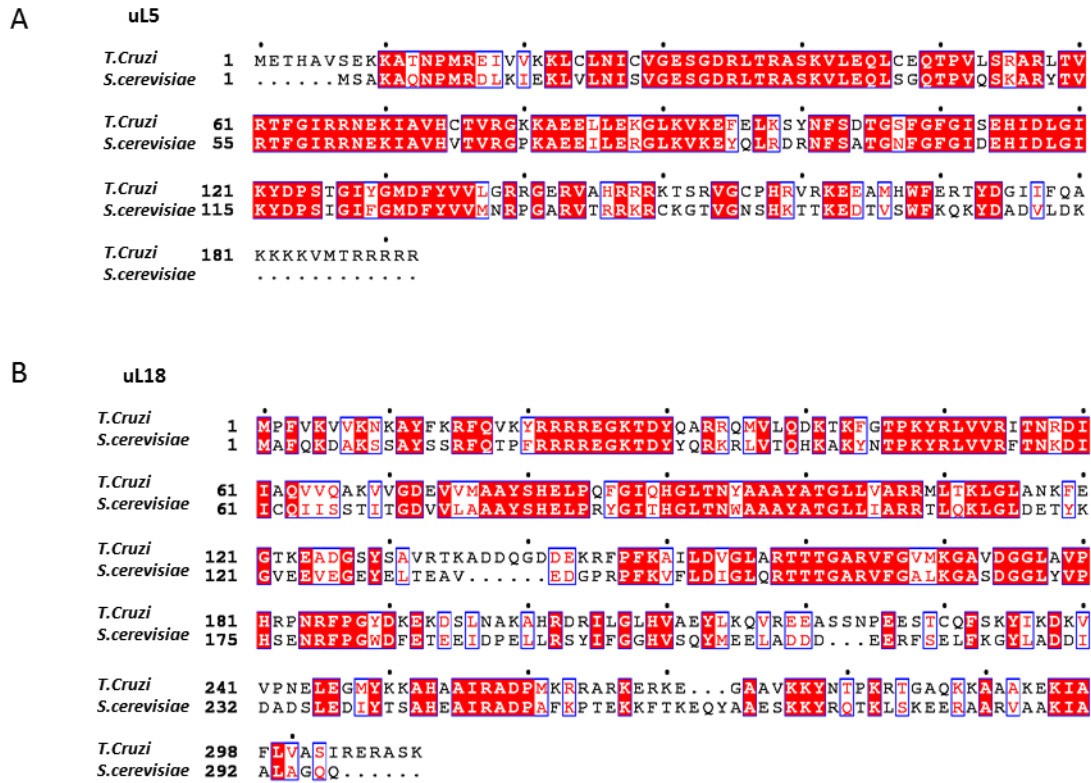

**Fig. S13. Sequence alignment of 5S rRNA-associated proteins.** (A) Sequence alignment of protein uL5, whose identity between the two sequences is 69%. (B) Sequence alignment of protein uL18, whose identity between the two sequences is 49%.



Fig. S14

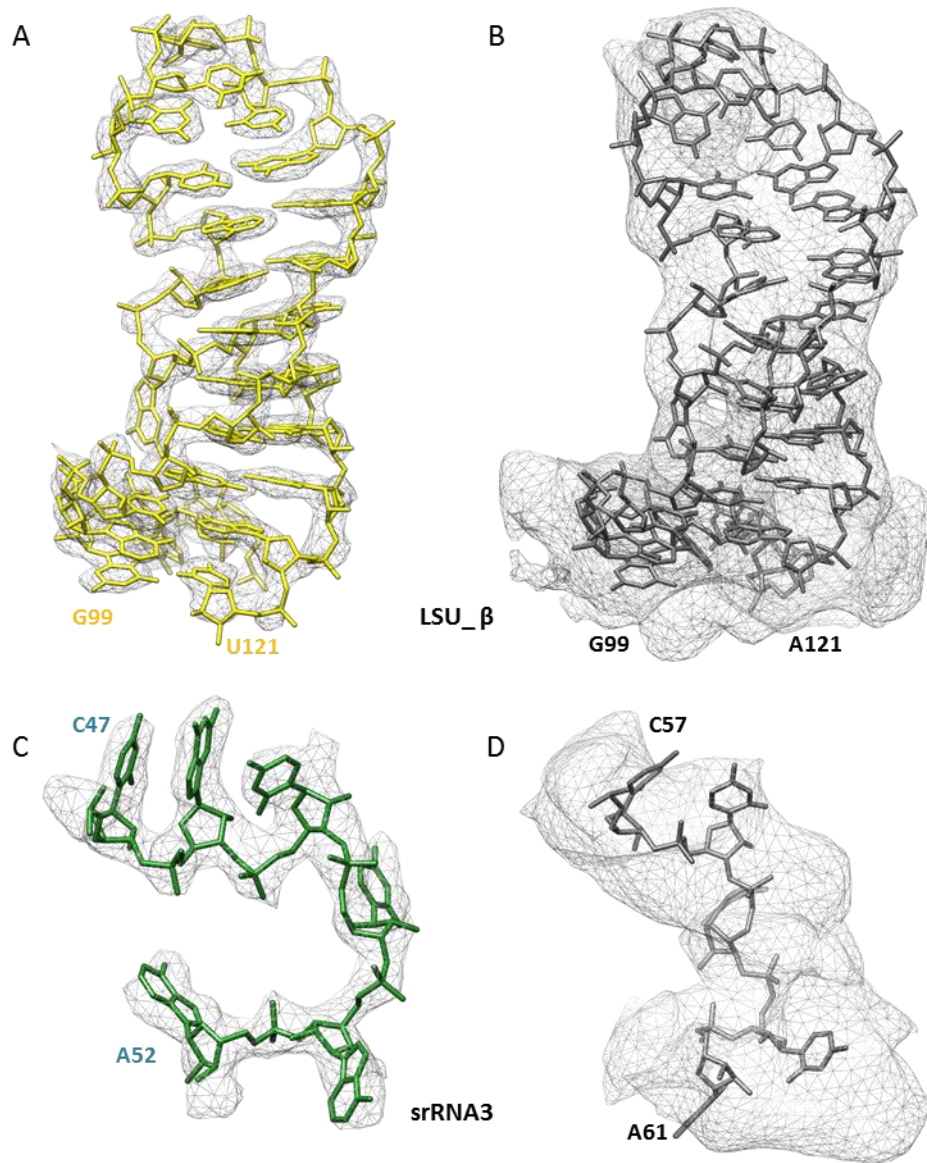

**Fig. S14. Comparison of some regions of 2.5 Å *T. cruzi* and 5.5 Å *T. brucei* ribosome density maps, superimposed with their corresponding atomic models. (A) A double-helical region of LSU- $\beta$  from the *T. cruzi* map and model. (B) The same region from the *T. brucei* map and model as in (A). (C) A single-stranded fragment of srRNA3 from the *T. cruzi* map and model. (D) The same region from the *T. brucei* map and model as in (C).**

Fig. S15

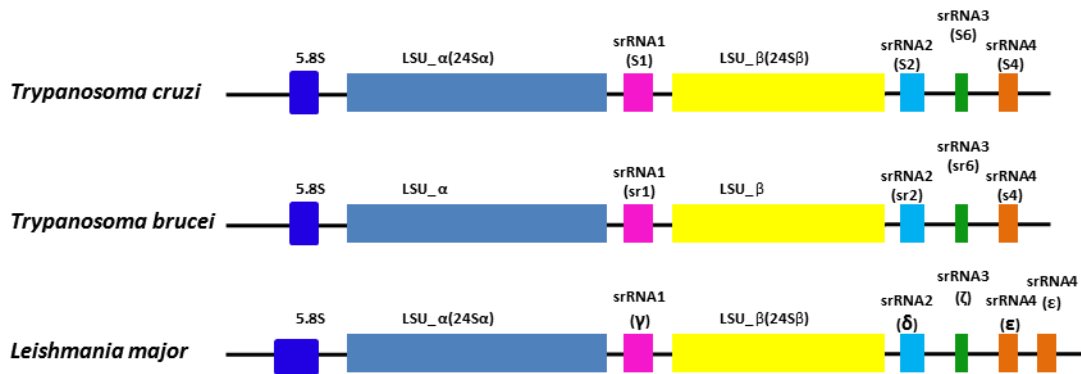

**Fig. S15. Schematic representation of the large subunit rRNA genes (except 5S rRNA) from trypanosomatids.** The names in the bracket are their respective old nomenclatures.

Fig. S16

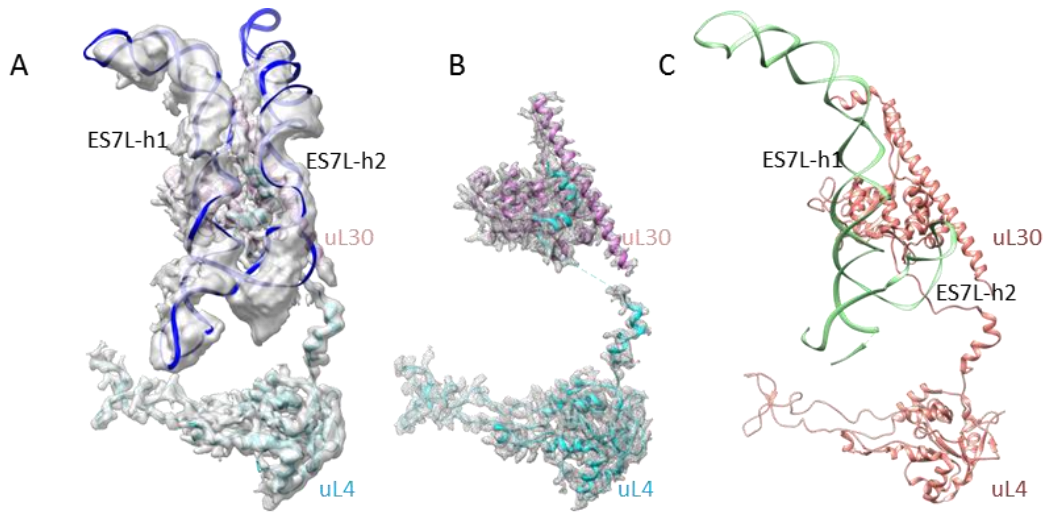

**Fig. S16. ES7L and its contacting proteins uL4 and uL30.** (A) ES7L (blue) taken from the *T. brucei* model (4V8M.pdb), and uL4 and uL30 from our model were fitted to the *T. cruzi* unsharpened map. (B) uL4 and uL30 superimposed onto the sharpened map, in the same view as in (A). The extension of uL4 is gripped by the long helices of ES7L, as shown by combination of (A) and (B). (C) ES7L (light green), composed of one long bent helix and one short helix, and uL4 and uL30 (brown) from yeast shown in the same view as (A) and (B).

Fig. S17

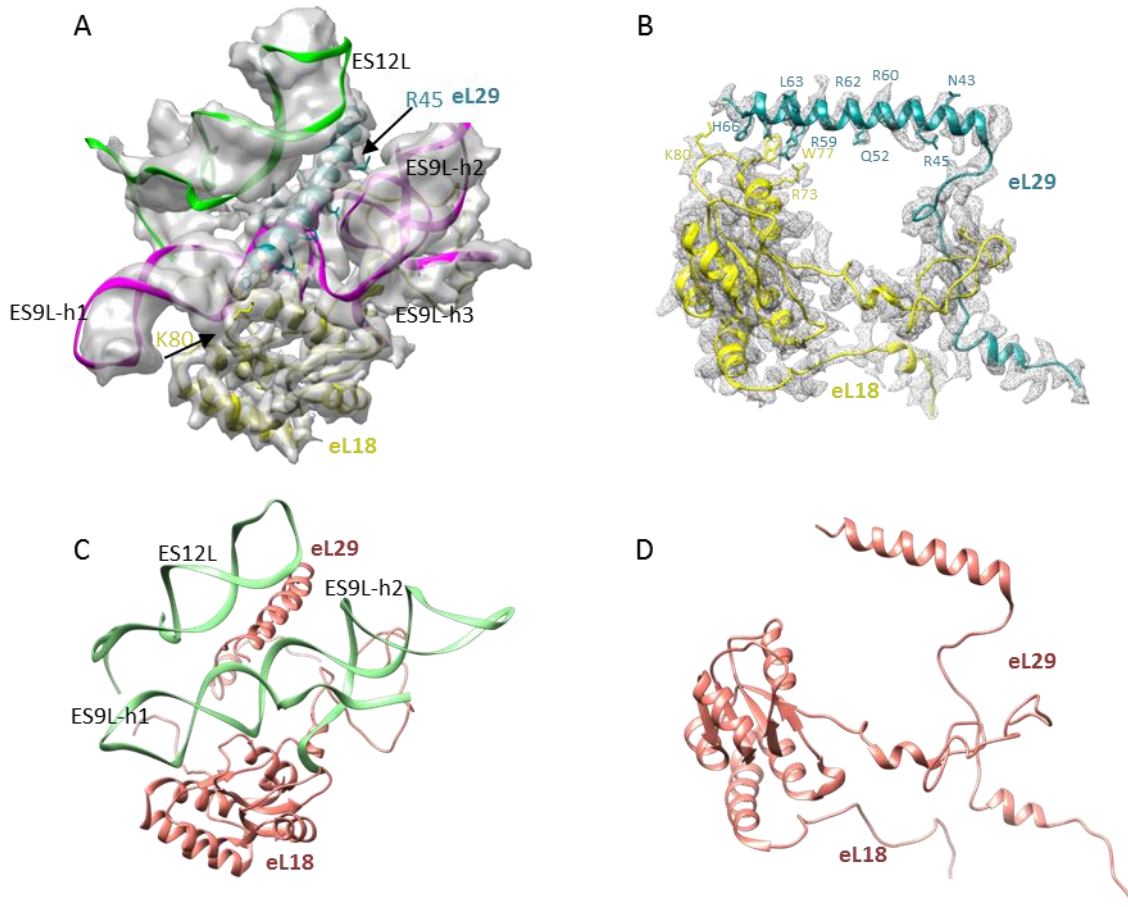

**Fig. S17. C-terminal extension of eL29 contacts eL18 and is surrounded by ES9L and ES12L.** (A) ES9L (magenta) and ES12L (green) taken from the *T. brucei* ribosome model (4V8M.pdb), and eL18 and eL29 from our model were fitted into the *T. cruzi* unsharpened map. (B) Interactions of eL29 extension with eL18. The models are fitted to the sharpened map. (C) ES9L, ES12L, eL18, and eL29 in yeast, in the same view as in (A). (D) eL29 and eL18 of yeast in the same view as in (B).

**Table. S1**

|                  | 5.8S | LSU- $\alpha$ | srRNA1 | LSU- $\beta$ | srRNA2 | srRNA3 | srRNA4 | Ref. |
|------------------|------|---------------|--------|--------------|--------|--------|--------|------|
| <i>T. cruzi</i>  | 172  | 1969          | 209    | 1661         | 178    | 72     | 136    | [11] |
| <i>T. brucei</i> | 115  | 1840          | 220    | 1570         | 180    | 70     | 140    | [8]  |
| <i>L. major</i>  | 283  | 1781          | 213    | 1525         | 183    | 73     | 129    | [5]  |

Table S1. The length of different pieces of rRNA (except 5S rRNA) for three trypanosomatids

**Table. S2**

| Parameters                                  | Value   |
|---------------------------------------------|---------|
| <b>3D reconstruction</b>                    |         |
| Particle mumbles                            | 235 348 |
| accuracy of rotation (°)                    | 0.43    |
| accuracy of translation (Å)                 | 0.42    |
| Resolution (unmasked, Å)                    | 2.9     |
| Resolution (masked, Å)                      | 2.5     |
| Map sharpening B-factor (Å <sup>2</sup> )   | -51.16  |
| <b>Model Refinement</b>                     |         |
| Cell dimensions a=b=c (Å)                   | 240.35  |
| Cell dimensions $\alpha =\beta =\gamma$ (°) | 90      |
| Map CC                                      | 0.58    |
| Resoluion( Å)                               | 2.5     |
| r.m.s. deviations Bond length (Å)           | 0.016   |
| r.m.s. deviations Bond angle (°)            | 1.5     |
| Clash score                                 | 18.8    |
| <b>Ramachandran plot</b>                    |         |
| Favored (%)                                 | 93.4    |
| Allowed (%)                                 | 5.4     |
| Outliers (%)                                | 1.2     |
| MolProbity Score                            | 2.2     |
| Favored rotatomers (%)                      | 98.0    |
| Corrected sugar puckers (%)                 | 97.6    |
| Good backbone conformation (%)              | 75.2    |
| EM Ringer Score                             | 4.32    |

Table S2. 3D reconstruction and model statistics of *T. cruzi* large ribosomal subunit

**Table S3**

| Components  | Number                    |
|-------------|---------------------------|
| Proteins    | 38                        |
| rRNA        | 8 pieces                  |
| H2O         | 84                        |
| Mg          | 105                       |
| Zn          | 3                         |
| Methylation | 66 2'-O methylation       |
|             | 10 nucleobase methylation |

Table S3. Summary of the *T. cruzi* ribosomal large subunit model

**Table S4**

| RNA                            | Length | Built                                                                                                                    |
|--------------------------------|--------|--------------------------------------------------------------------------------------------------------------------------|
| <b>5S</b>                      | 118    | 1-87,91-118                                                                                                              |
| <b>5.8S</b>                    | 172    | 1-79,89-125,139-169                                                                                                      |
| <b>LSU-<math>\alpha</math></b> | 1969   | 3-154,175-198,205-219,232-281,304-519,585-604,744-853,866-880,916-1171,1221-1384,1491-1545,1569-1691,1709-1805,1918-1964 |
| <b>srRNA1</b>                  | 209    | 2-12,21-74,95-152,175-185,191-209                                                                                        |
| <b>LSU-<math>\beta</math></b>  | 1661   | 6-136,446-594,616-789,852-913,1105-1113,1134-1232,1240-1330,1343-1397,1443-1580, KSD (partially).                        |
| <b>srRNA2</b>                  | 178    | 21-44,57-128,154-178                                                                                                     |
| <b>srRNA3</b>                  | 72     | 1-17,44-72                                                                                                               |
| <b>srRNA4</b>                  | 136    | 2-47,62-68,87-112,120-125,128-133                                                                                        |

Table S4. Summary of the modeled ribosomal rRNA



**Table S5**

| LSU- $\alpha$   | Location                      | LSU- $\beta$       | Location |
|-----------------|-------------------------------|--------------------|----------|
| 154-175         | H16                           | 137-445            | ES27L    |
| 198-232         | ES42L                         | 595-615            | H69      |
| 281-304         | H17                           | 790-851            | H76      |
| 519-584         | ES7L                          | 914-1104,1114-1133 | ES31L    |
| 853-866,880-916 | ES9L                          | 1233-1249          | H84      |
| 1171-1221       | H38                           | 1331-1342          | H87      |
| 1385-1491       | H42-43                        | 1398-1442          | H89      |
| 1545-1569       | ES15L                         |                    |          |
| 1691-1709       | <i>T.c.</i> specific fragment |                    |          |
| 1805-1917       | ES19L                         |                    |          |
|                 |                               |                    |          |

Table S5. The unmolded ribosomal rRNA of LSU- $\alpha$  / $\beta$  location

**Table S6**

| ES    | Coordinates              | Function                               | Uniqueness compared with yeast ribosome                      | Description                                                                             |
|-------|--------------------------|----------------------------------------|--------------------------------------------------------------|-----------------------------------------------------------------------------------------|
| ES3L  | 5.8S (121-139)           | Structural stabilization               | Increased size                                               | Contacts the 3' end of LSU- $\alpha$                                                    |
| ES7L  | LSU- $\alpha$ (484-750)  | Regulation                             | two long bent helices                                        | Surrounds uL4 linking ES7L to PET                                                       |
| ES9L  | LSU- $\alpha$ (848-953)  | Regulation                             | One additional helix                                         | Surrounds eL29 linking ES9L to PTC                                                      |
| ES27L | LSU- $\beta$ (128-451)   | Structure stabilization and regulation | Longer                                                       | Contacts S-domain of SRP and forms a bridge with SSU                                    |
| ES31L | LSU- $\beta$ (866-1146)  | Structure stabilization and regulation | One additional helix                                         | Contacts the 3' end of 5.8S and uL23, which contacts SRP                                |
| ES42L | LSU- $\alpha$ (198-239)  | Structure stabilization and regulation | Trypanosome specific<br>Occupies the C-termini of yeast uL22 | Contacts srRNA2-4 cleavage sites and contacts uL22(part of PET)                         |
| KSD   | LSU- $\beta$ (1585-1661) | Regulation                             | Trypanosome specific                                         | Binds to uL3 which "wiggle" to PTC (19) and contacts srRNA2 containing sasin-ricin loop |

Table S6. The expansion segments with unusual size and Trypanosome-specific ES

**Table S7**

| Protein names | Old nomenclature | Protein ID  | Range modeled               | a.a. size | Modeled percentage | ChainID |
|---------------|------------------|-------------|-----------------------------|-----------|--------------------|---------|
| uL2           | L2               | XP_816366.1 | 2-246                       | 260       | 94%                | e       |
| uL3           | L3               | XP_814673.1 | 2-404                       | 428       | 94%                | f       |
| uL4           | L4               | XP_804516.1 | 6-302,315-342               | 374       | 87%                | r       |
| uL5           | L11              | XP_803249.1 | 17-27,73-78,105-109,130-172 | 192       | 34%                | L       |
| eL6           | L6               | XP_806123.1 | 23-104,144-193              | 193       | 68%                | v       |
| eL8           | L7a              | XP_821284.1 | 88-169,185-310              | 319       | 65%                | x       |
| uL13          | L13a             | XP_810252.1 | 20-222                      | 222       | 91%                | O       |
| eL13          | L13              | XP_810966.1 | 2-134,168-206               | 218       | 79%                | N       |
| uL14          | L23              | XP_821640.1 | 13-139                      | 139       | 91%                | W       |
| eL14          | L14              | XP_804656.1 | 5-160                       | 180       | 87%                | P       |
| uL15          | L27a             | XP_821642.1 | 2-145                       | 145       | 99%                | b       |
| eL15          | L15              | XP_814692.1 | 2-204                       | 204       | 100%               | Q       |
| uL18          | L5               | XP_805667.1 | 6-113, 146-259              | 309       | 62%                | u       |
| eL18          | L18              | XP_819826.1 | 2-193                       | 193       | 99%                | l       |
| eL19          | L19              | XP_820996.1 | 3-189                       | 372       | 50%                | T       |
| eL20          | L18a             | XP_819631.1 | 2-178                       | 179       | 99%                | S       |
| eL21          | L21e             | XP_812750.1 | 3-113,134-148               | 159       | 79%                | U       |
| uL22          | L17              | XP_804874.1 | 3-154                       | 166       | 92%                | R       |
| eL22          | L22              | XP_819834.1 | 24-33,46-72,75-122          | 130       | 65%                | V       |
| uL23          | L23a             | XP_820993.1 | 78-94,102-193               | 194       | 56%                | X       |
| uL24          | L26              | XP_806321.1 | 7-119                       | 143       | 79%                | Z       |
| eL24          | L24              | XP_804713.1 | 3-63                        | 125       | 49%                | Y       |
| eL27          | L27              | XP_809804.1 | 2-50,58-86,107-133          | 133       | 79%                | a       |
| eL28          | L28              | XP_820211.1 | 5-82,88-128                 | 146       | 82%                | c       |
| uL29          | L35              | XP_811059.1 | 7-38,46-126                 | 127       | 89%                | k       |
| eL29          | L29              | XP_803994.1 | 6-68.                       | 71        | 89%                | d       |
| uL30          | L7               | XP_816099.1 | 28-242                      | 242       | 89%                | w       |
| eL30          | L30              | XP_810701.1 | 14-72,91-97                 | 105       | 63%                | g       |
| eL31          | L31              | XP_808028.1 | 13-156,164-186              | 188       | 89%                | h       |
| eL32          | L32              | XP_817439.1 | 11-123                      | 132       | 86%                | i       |
| eL33          | L35a             | XP_821812.1 | 8-149                       | 149       | 95%                | l       |
| eL34          | L34              | XP_811573.1 | 4-107                       | 171       | 61%                | j       |
| eL36          | L36              | XP_805417.1 | 14-108                      | 114       | 83%                | m       |
| eL37          | L37              | XP_807547.1 | 2-82                        | 84        | 96%                | n       |
| eL38          | L38              | XP_816521.1 | 2-14,21-59                  | 82        | 63%                | p       |
| eL39          | L39              | XP_808953.1 | 2-51                        | 51        | 98%                | q       |
| eL42          | L44              | XP_806035.1 | 2-94                        | 106       | 88%                | t       |
| eL43          | L37a             | XP_808231.1 | 3-87                        | 90        | 94%                | o       |

Table S7. Modeled proteins of the *T. cruzi* 60S ribosomal subunit

**Table S8**

| srRNAs | Anchoring proteins | Contacting sites                                       |
|--------|--------------------|--------------------------------------------------------|
| srRNA1 | eL19               | 92,103,110,124,128                                     |
|        | eL34               | W47, H51                                               |
| srRNA2 | uL3                | 26,27,31,50,92,99,104,161,130,131,133,185,229,236,339, |
| srRNA3 | eL6                | 47,73,81,76-78,170                                     |
|        | eL33               | 85,87,139,39,141,143,109,79,79,145,31-33               |
| srRNA4 | eL31               | 91,115,146                                             |

Table S8. Residues of anchoring proteins involved in assembly of small pieces rRNA

Table S9

| Expansion Segment | Comparison between <i>T. cruzi</i> 60S and human ribosome                   |
|-------------------|-----------------------------------------------------------------------------|
| ES3L              | A couple of nucleotides longer in <i>T. cruzi</i>                           |
| ES4L              | Conserved                                                                   |
| ES5L              | A couple of nucleotides shorter in <i>T. cruzi</i>                          |
| ES7L              | Truncated in <i>T. cruzi</i>                                                |
| ES8L              | A couple of nucleotides shorter in <i>T. cruzi</i>                          |
| ES9L              | Conserved, both composed of three helices but have different configurations |
| ES10L             | Truncated in <i>T. cruzi</i>                                                |
| ES12L             | Conserved                                                                   |
| ES15L             | Truncated in <i>T. cruzi</i>                                                |
| ES19L             | Expanded in <i>T. cruzi</i>                                                 |
| ES20L             | Missing in trypanosomes/location at cleavage site LSU- $\alpha$ and srRNA1  |
| ES26L             | Missing in trypanosomes/location at cleavage site srRNA1 and LSU- $\beta$   |
| ES27L             | Truncated in <i>T. cruzi</i>                                                |
| ES30L             | Truncated in <i>T. cruzi</i>                                                |
| ES31L             | Expanded in <i>T. cruzi</i>                                                 |
| ES35L             | Conserved                                                                   |
| ES39L             | Truncated in <i>T. cruzi</i>                                                |
| ES41L             | Expanded in <i>T. cruzi</i>                                                 |
| ES42L             | Trypanosome specific                                                        |

Table S9. Expansion segments compared with human ribosome counterparts

**Table S10**

| Protein names | a.a. size of <i>T. cruzi</i> | a.a. of <i>S. cerevisiae</i> | a.a. size of <i>H. sapiens</i> | Description                                                                                         |
|---------------|------------------------------|------------------------------|--------------------------------|-----------------------------------------------------------------------------------------------------|
| uL2           | 260                          | 254                          | 257                            | Very conserved                                                                                      |
| uL3           | 428                          | 387                          | 403                            | Insertion of a.a 209-211 and extension on C-terminal contacts srRNA4                                |
| uL4           | 374                          | 362                          | 427                            | C-terminal Extension                                                                                |
| uL5           | 192                          | 174                          | 178                            | N- and C- terminal extensions                                                                       |
| eL6           | 193                          | 176                          | 192                            | Inserted residues 128-143 are located on the less ordered region.                                   |
| eL8           | 319                          | 256                          | 288                            | N-terminal extension                                                                                |
| uL13          | 222                          | 199                          | 203                            | Contacts srRNA3                                                                                     |
| eL13          | 218                          | 199                          | 211                            | Conserved                                                                                           |
| uL14          | 139                          | 137                          | 140                            | Conserved                                                                                           |
| eL14          | 180                          | 138                          | 215                            | Shortened at N-terminal and C-terminal extension compared to S.c                                    |
| uL15          | 145                          | 149                          | 148                            | Conserved                                                                                           |
| eL15          | 204                          | 204                          | 204                            | Conserved                                                                                           |
| uL18          | 309                          | 297                          | 297                            | Insertion a.a 136-141, a.a 222-224, deletion of residues 163-165 in yeast, and C-terminal extension |
| eL18          | 193                          | 186                          | 188                            | Insertion of a.a 72-77                                                                              |
| eL19          | 372                          | 189                          | 196                            | Conserved, C-terminal extension contacts SSU                                                        |
| eL20          | 179                          | 174                          | 176                            | Conserved                                                                                           |
| eL21          | 159                          | 160                          | 160                            | Conserved                                                                                           |
| uL22          | 166                          | 184                          | 184                            | C-terminal is shortened, resulting in absence of contacts with ES39L homolog, srRNA3                |
| eL22          | 130                          | 121                          | 128                            | Conserved                                                                                           |
| uL23          | 194                          | 142                          | 156                            | Extension at N-terminal                                                                             |
| uL24          | 143                          | 127                          | 145                            | Extension at N-terminal                                                                             |
| eL24          | 125                          | 155                          | 145                            | Shortened at C-terminal                                                                             |
| eL27          | 133                          | 136                          | 136                            | Conserved                                                                                           |
| eL28          | 146                          | /                            | 137                            | Insertion of a.a 118-132                                                                            |
| uL29          | 127                          | 120                          | 123                            | Insertion of a.a 81–84                                                                              |
| eL29          | 71                           | 59                           | 159                            | Extension at C-terminal compared to yeast                                                           |
| uL30          | 242                          | 244                          | 248                            | Conserved                                                                                           |
| eL30          | 105                          | 105                          | 115                            | Conserved                                                                                           |
| eL31          | 188                          | 113                          | 125                            | Extension at C-terminal. Contacts KSD                                                               |
| eL32          | 132                          | 130                          | 135                            | Conserved                                                                                           |
| eL33          | 149                          | 107                          | 110                            | Extension at N-terminal and insertion of a.a 89-98                                                  |
| eL34          | 171                          | 121                          | 117                            | Extension at C-terminal and insertion of a.a 45-50 that contact srRNA1                              |
| eL36          | 114                          | 100                          | 105                            | Conserved                                                                                           |
| eL37          | 84                           | 88                           | 97                             | Conserved                                                                                           |
| eL38          | 82                           | 78                           | 70                             | Contacts srRNA1                                                                                     |
| eL39          | 51                           | 51                           | 51                             | Conserved                                                                                           |
| eL42          | 106                          | 106                          | 106                            | Conserved                                                                                           |
| eL43          | 90                           | 92                           | 92                             | Conserved                                                                                           |

Table S10. Proteins compared with human and yeast ribosome counterparts
